# Supplementary material
Source: PubMed Central journal article supplement (PMC2693885)
Supplement: NIHMS106985-supplement-01.pdf [file NIHMS106985-supplement-01.pdf]

1 **Supplemental table**

2

3 **Table 1.** Nucleotide positions<sup>a</sup> of viral deletions

| <i>Virus</i> | <i>Deletion</i>  |             |           | <i>Deletion</i>  |             |           |
|--------------|------------------|-------------|-----------|------------------|-------------|-----------|
|              | <i>size (bp)</i> | <i>from</i> | <i>to</i> | <i>size (bp)</i> | <i>from</i> | <i>to</i> |
| vN3          | 1,740            | 904         | 2,644     | 7,892            | 7,159       | 15,051    |
| vN13         | 1,687            | 949         | 2,636     | 10,393           | 7,243       | 17,636    |
| vN2          | 17,910           | 7,248       | 25,158    |                  |             |           |
| vN13R10-IEOA |                  |             |           | 32,826           | 198,866     | 231,692   |
| vN2-IEOA     | 17,910           | 7,248       | 25,158    | 32,826           | 198,866     | 231,692   |
| vN13R10-BVD  |                  |             |           | 15,085           | 196,687     | 211,772   |
| R75          |                  |             |           | 14,078           | 197,061     | 211,139   |

4 <sup>a</sup>nucleotide positions are according to the numbering in GenBank accession #FJ355434.

5
